# Supplementary material for: Expression of Telomeric Repeat–Containing RNA Decreases in Sarcopenia and Increases after Exercise and Nutrition Intervention
Source: PubMed Central journal article supplement (PMC7762552; doi:10.3390/nu12123766), 2020-12-08
Supplement: nutrients-12-03766-s001.pdf [file nutrients-12-03766-s001.pdf]

**Supplementary Table 1.** List of the primers for RT-qPCR

| Primer Name | Forward Sequence                                | Reverse Sequence                                  |
|-------------|-------------------------------------------------|---------------------------------------------------|
| TERRA       | 5'-GGTTTTTGAGGGTGAGGGTGA<br>GGGTGAGGGTGAGGGT-3' | 5'-TCCCGACTATCCCTATCCC<br>TATCCCTATCCCTATCCCTA-3' |
| B2M         | 5'-CTATCCAGCGTACTCCAAAG-3'                      | 5'-GAAAGACCAGTCCTTGCTGA-3'                        |

**Abbreviation:** TERRA, Telomeric repeat-containing RNA. B2M, Beta-2 microglobulin
